# Supplementary material for: Low-temperature dissociation of CO2 molecules on vicinal Cu surfaces
Source: Royal Society of Chemistry journal article supplement (doi:10.1039/d3cp06336d), 2024-01-01
Supplement: d3cp06336d1.pdf [file d3cp06336d1.pdf]

## Supplementary information

### Low-temperature dissociation of CO<sub>2</sub> molecules on vicinal Cu surfaces

Takanori Koitaya<sup>a\*</sup>, Yuichiro Shiozawa<sup>b</sup>, Yuki Yoshikura<sup>b</sup>, Kozo Mukai<sup>b</sup>, Shinya Yoshimoto<sup>b</sup>,  
and Jun Yoshinobu<sup>b\*</sup>

<sup>a)</sup> Department of Chemistry, Graduate School of Science, Kyoto University, Kitashirakawa-Oiwakecho,  
Sakyo-Ku, Kyoto 606-8502, Japan

<sup>b)</sup> The Institute for Solid State Physics, The University of Tokyo, 5-1-5, Kashiwanoha, Kashiwa, Chiba,  
277-8581, Japan

<sup>\*)</sup> E-mails: koitaya.takanori.5j@kyoto-u.ac.jp (T. K.) and junyoshi@issp.u-tokyo.ac.jp (J. Y.)

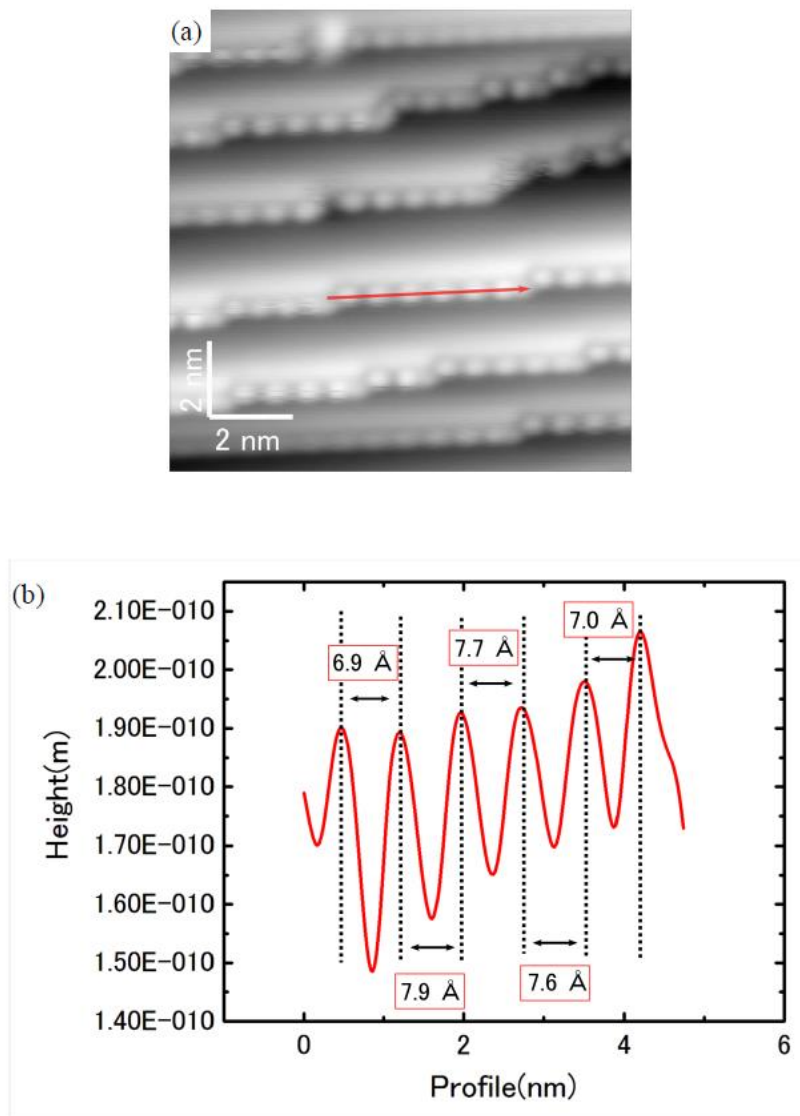

**Figure S1.** (a) An STM image of Cu(997) after 0.3 L CO exposure at 79 K.  $V_s = +0.5$  V and  $I = 50$  pA. (b) A line profile along a red arrow in (a).

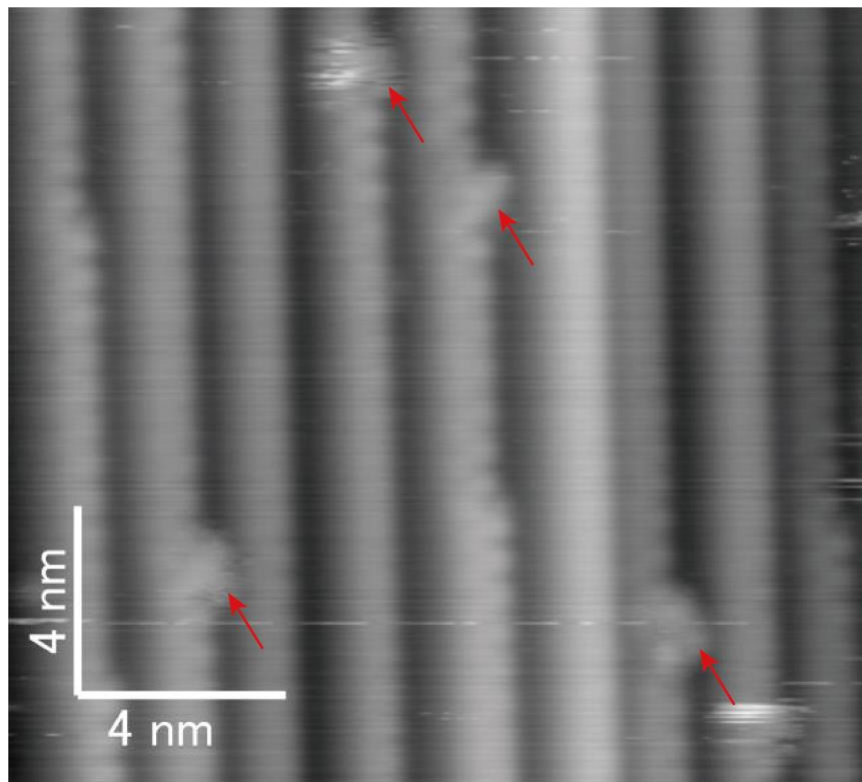

**Figure S2.** An STM image of Cu(997) after 100 L CO<sub>2</sub> exposure at 92 K.  $V_s = +1.0$  V and  $I = 50$  pA. Red arrows in the figure indicate irregular, fuzzy protrusions at kink sites, which are formed after the CO<sub>2</sub> dissociation reaction.

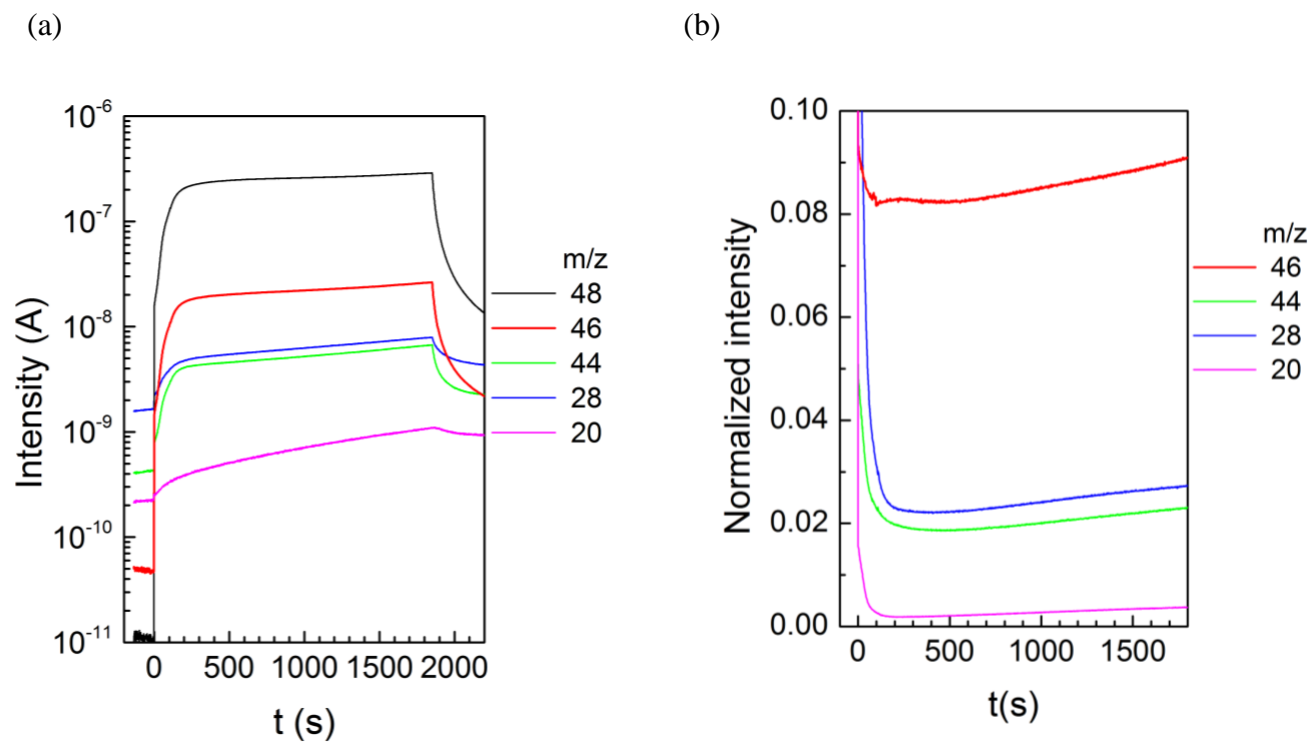

**Figure S3.** (a) QMS spectra during the  $\text{C}^{18}\text{O}_2$  reaction at a  $\text{CO}_2$  pressure of  $1.3 \times 10^{-5}$  Pa on the Cu(997) surface at 82 K as a function of exposure time. (b) Relative QMS intensity normalized by the  $m/z = 48$  signal. The surface was first oppositely oriented from QMS and then faced to QMS at  $t = 100$  s.

(a)

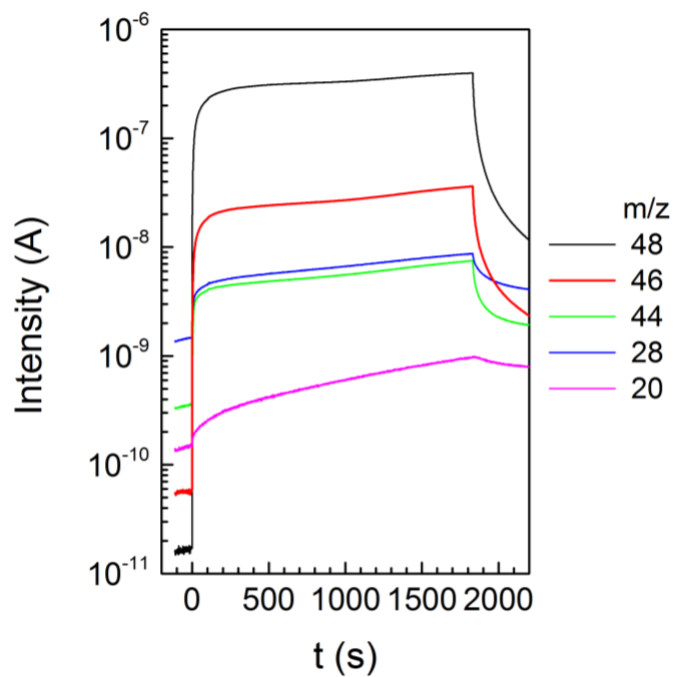

(b)

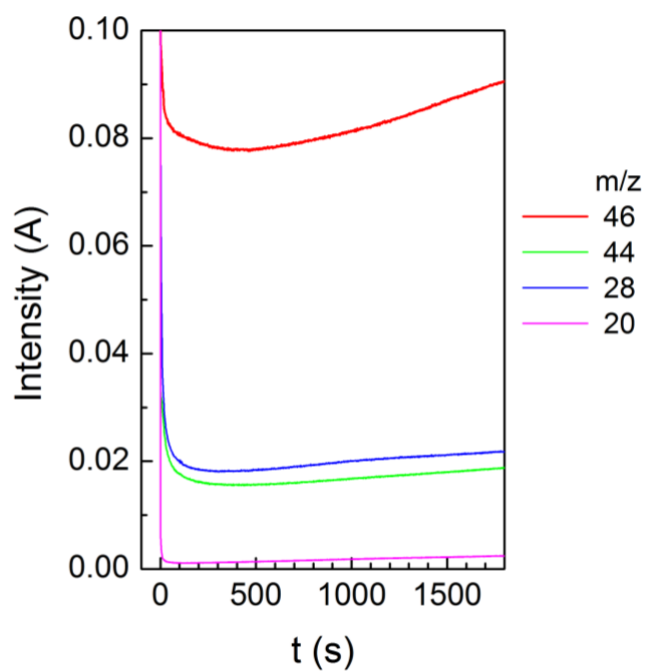

**Figure S4.** (a) QMS spectra during the  $\text{C}^{18}\text{O}_2$  reaction at a  $\text{CO}_2$  pressure of  $1.3 \times 10^{-5}$  Pa on the cyclohexane-covered Cu(997) surface at 82 K as a function of exposure time. (b) Relative QMS intensity normalized by the  $m/z = 48$  signal. The surface was first oppositely oriented from QMS and then faced to QMS at  $t = 100$  s.

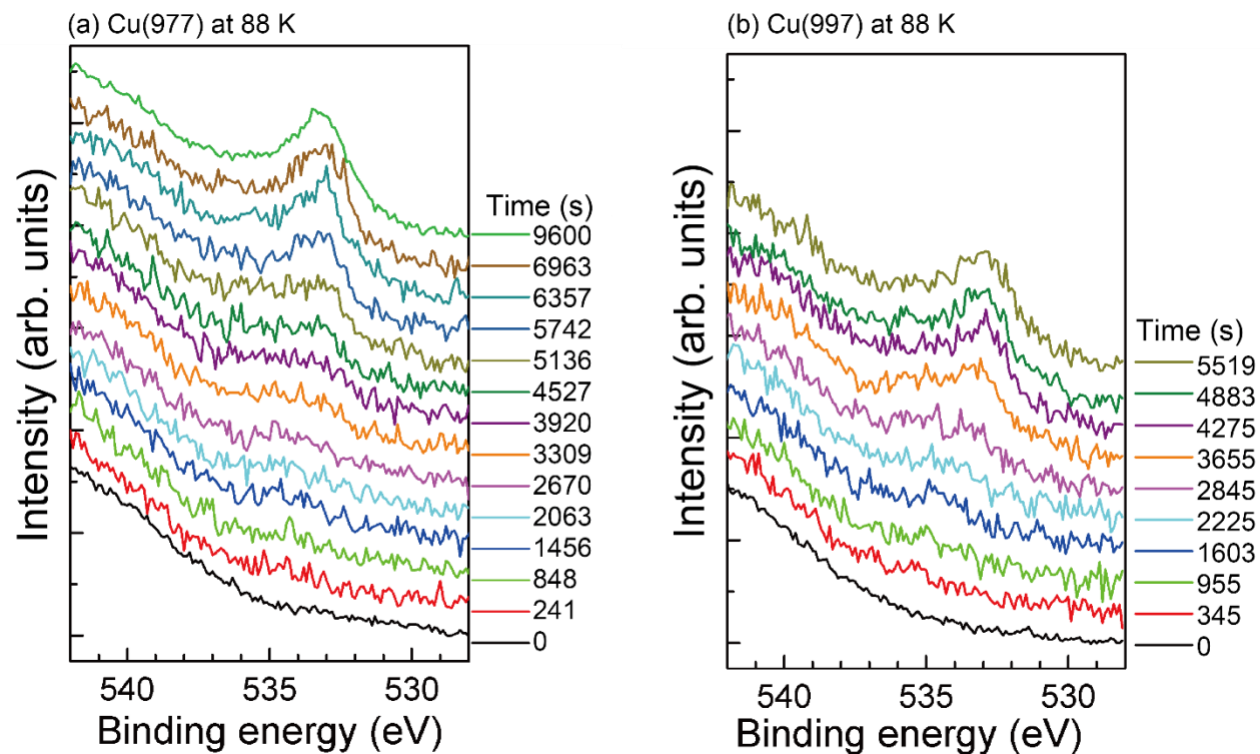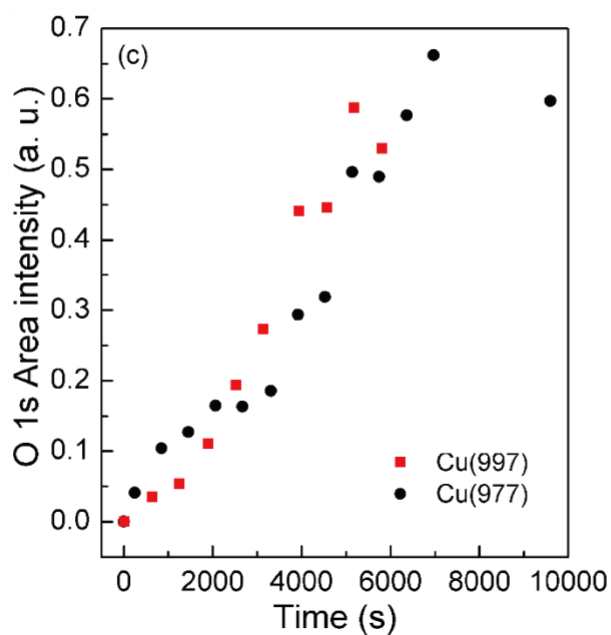

**Figure S5.** O 1s XPS spectra during the CO<sub>2</sub> reaction at a CO<sub>2</sub> pressure of  $3 \times 10^{-6}$  Pa on (a) Cu(977) and (b) Cu(997) at 88 K as a function of exposure time. (c) O 1s total area intensity of the adsorbates.
